# Supplementary material
Source: PubMed Central journal article supplement (PMC11657144)
Supplement: NIHMS2041729-supplement-Supplement.pdf [file NIHMS2041729-supplement-Supplement.pdf]

Supplemental Figure S1. Correlation of variables

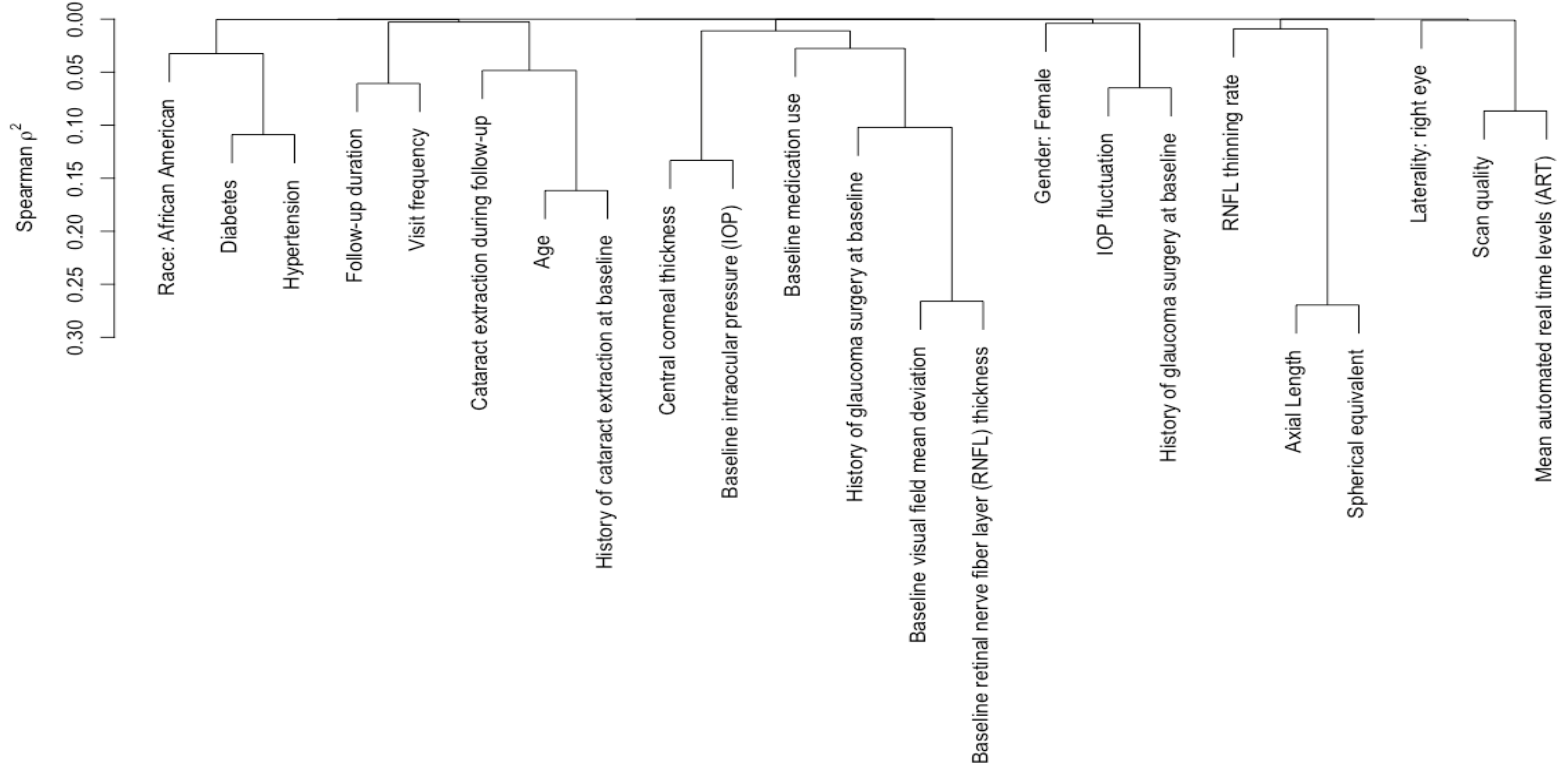

## Supplemental Figure S2. Proportions of missing data

(A) Percentage of eyes with missing data

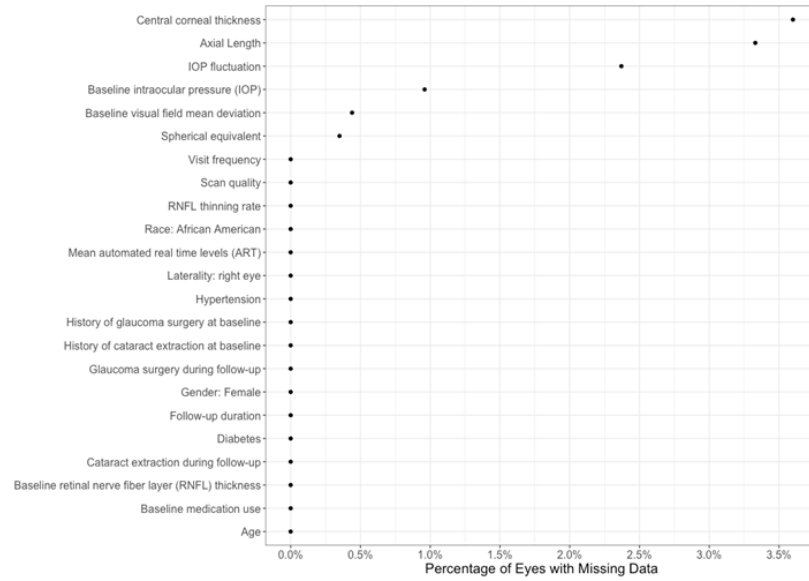

(B) Percentage of missing data

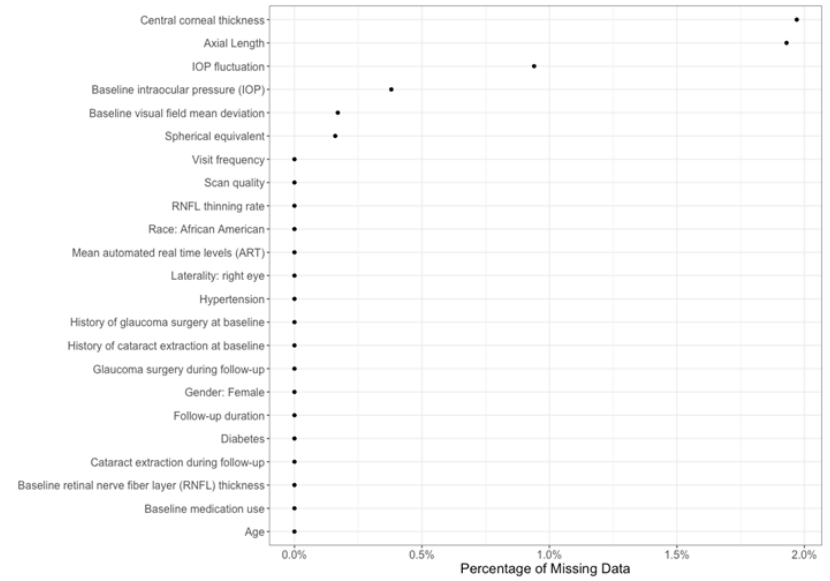

| <b>Supplemental Table S1. Effects of clinical factors on OCT measurement variability – Univariable analysis</b> |                  |                      |           |                  |                            |
|-----------------------------------------------------------------------------------------------------------------|------------------|----------------------|-----------|------------------|----------------------------|
| <b>Variable</b>                                                                                                 | <b>Intercept</b> | <b>β Coefficient</b> | <b>SE</b> | <b>P-value</b>   | <b>Total R<sup>2</sup></b> |
| Age, per 1 year older                                                                                           | 1.233            | 0.004                | 0.003     | 0.170            | 0.2806                     |
| Gender: Female (vs. male)                                                                                       | 1.528            | -0.037               | 0.062     | 0.547            | 0.1850                     |
| Race: African American (vs. others)                                                                             | 1.428            | 0.211                | 0.063     | <b>&lt;0.001</b> | 0.1850                     |
| Diabetes (yes/no)                                                                                               | 1.479            | 0.216                | 0.091     | <b>0.018</b>     | 0.1850                     |
| Hypertension (yes/no)                                                                                           | 1.482            | 0.051                | 0.061     | 0.398            | 0.1850                     |
| Laterality: Right eye                                                                                           | 1.466            | 0.084                | 0.008     | <b>&lt;0.001</b> | 0.1855                     |
| CCT, per 1 μm thicker                                                                                           | 1.890            | -0.001               | 0.001     | 0.364            | 0.2805                     |
| AL, per 1 mm longer                                                                                             | 1.782            | -0.011               | 0.028     | 0.690            | 0.2810                     |
| Spherical equivalent, per 1 D higher                                                                            | 1.537            | 0.043                | 0.014     | <b>0.002</b>     | 0.2806                     |
| Baseline VF MD, per 1 dB higher                                                                                 | 1.435            | -0.024               | 0.007     | <b>&lt;0.001</b> | 0.2806                     |
| Baseline IOP, per 1 mmHg higher                                                                                 | 1.630            | -0.007               | 0.006     | 0.226            | 0.2806                     |
| IOP fluctuation, per 1 mmHg higher                                                                              | 1.169            | 0.134                | 0.021     | <b>&lt;0.001</b> | 0.2699                     |
| Baseline medication use (yes/no)                                                                                | 1.487            | 0.024                | 0.078     | 0.754            | 0.1850                     |
| History of CE at baseline (yes/no)                                                                              | 1.557            | -0.281               | 0.026     | <b>&lt;0.001</b> | 0.1857                     |
| CE during follow-up (yes/no)                                                                                    | 1.392            | 0.534                | 0.023     | <b>&lt;0.001</b> | 0.1877                     |
| History of glaucoma surgery at baseline (yes/no)                                                                | 1.490            | 0.067                | 0.024     | <b>0.006</b>     | 0.1850                     |
| Glaucoma surgery during follow-up (yes/no)                                                                      | 1.458            | 0.242                | 0.018     | <b>&lt;0.001</b> | 0.1859                     |
| Baseline RNFLT, per 1 μm thicker                                                                                | 1.505            | 0.000                | 0.002     | 0.955            | 0.2806                     |
| RNFL thinning rate, per 1 μm/year more positive                                                                 | 1.415            | 0.050                | 0.035     | 0.150            | 0.2805                     |
| Scan quality, per 1 unit higher                                                                                 | 1.633            | -0.005               | 0.002     | <b>0.009</b>     | 0.1912                     |
| Mean ART, per 1 unit higher                                                                                     | 1.515            | 0.000                | 0.000     | 0.219            | 0.1850                     |
| Follow-up duration, per 1 year longer                                                                           | 1.306            | 0.032                | 0.011     | <b>0.006</b>     | 0.2806                     |
| Visit frequency, per 1 time/year higher                                                                         | 1.806            | -0.177               | 0.065     | <b>0.007</b>     | 0.2806                     |

Abbreviation: AL = axial length, ART = automated real time value, CCT = central corneal thickness, CE = cataract extraction, IOP = intraocular pressure, OCT = optical coherence tomography, RNFL = retinal nerve fiber layer, RNFLT= RNFL thickness, SE = standard error, VF MD = visual field mean deviation

| <b>Supplemental Table S2. RNFLT variability of patients stratified by the rate of RNFLT thinning</b> |                                                                   |                       |                   |
|------------------------------------------------------------------------------------------------------|-------------------------------------------------------------------|-----------------------|-------------------|
|                                                                                                      | <b>Mean (95% CI) RNFLT variability (<math>\mu\text{m}</math>)</b> |                       |                   |
| <b>Rate of RNFLT thinning</b>                                                                        | Whole cohort                                                      | Glaucoma suspect eyes | POAG eyes         |
| $\leq -1.0 \mu\text{m}/\text{year}$                                                                  | 1.49 (1.28, 1.70)                                                 | 1.30 (1.06, 1.55)     | 1.61 (1.30, 1.92) |
| $> -1.0$ and $\leq -0.5\mu\text{m}/\text{year}$                                                      | 1.27 (1.12, 1.42)                                                 | 1.13 (0.94, 1.31)     | 1.37 (1.14, 1.60) |
| $> -0.5 \mu\text{m}/\text{year}$                                                                     | 1.64 (1.48, 1.81)                                                 | 1.50 (1.31, 1.69)     | 1.73 (1.49, 1.98) |
| Abbreviation: RNFLT = retinal nerve fiber layer thickness; POAG = Primary open-angle glaucoma        |                                                                   |                       |                   |

**Supplemental Table S3. Effects of clinical factors on OCT measurement variability in patients without intervening surgeries - Full model (Multivariable analysis)**

| Variable                                                          | $\beta$ Coefficient              | SE    | P-value           |
|-------------------------------------------------------------------|----------------------------------|-------|-------------------|
| (Intercept)                                                       | 1.894                            | 1.232 | 0.124             |
| Age, per 1 year older                                             | 0.002                            | 0.003 | 0.603             |
| Gender: Female (vs. male)                                         | < 0.001                          | 0.001 | 0.823             |
| Race: African American (vs. others)                               | -0.015                           | 0.029 | 0.613             |
| Diabetes (yes/no)                                                 | -0.014                           | 0.007 | <b>0.039</b>      |
| Hypertension (yes/no)                                             | -0.005                           | 0.007 | 0.446             |
| Laterality: Right eye                                             | 0.033                            | 0.025 | 0.188             |
| CCT, per 1 $\mu\text{m}$ thicker                                  | 0.005                            | 0.002 | <b>0.012</b>      |
| AL, per 1 mm longer                                               | 0.020                            | 0.026 | 0.446             |
| Spherical equivalent, per 1 D higher                              | -0.022                           | 0.004 | <b>&lt; 0.001</b> |
| Baseline VF MD, per 1 dB higher                                   | < 0.001                          | 0.001 | 0.392             |
| Baseline IOP, per 1 mmHg higher                                   | 0.029                            | 0.010 | <b>0.006</b>      |
| IOP fluctuation, per 1 mmHg higher                                | 0.032                            | 0.018 | 0.069             |
| Baseline medication use (yes/no)                                  | -0.140                           | 0.055 | <b>0.012</b>      |
| History of CE at baseline (yes/no)                                | 0.055                            | 0.062 | 0.377             |
| History of glaucoma surgery at baseline (yes/no)                  | 0.008                            | 0.081 | 0.922             |
| Baseline RNFLT, per 1 $\mu\text{m}$ thicker                       | -0.015                           | 0.059 | 0.800             |
| RNFL thinning rate, per 1 $\mu\text{m}/\text{year}$ more positive | 0.009                            | 0.043 | 0.844             |
| Scan quality, per 1 unit higher                                   | -0.015                           | 0.072 | 0.834             |
| Mean ART, per 1 unit higher                                       | -0.083                           | 0.079 | 0.292             |
| Follow-up duration, per 1 year longer                             | 0.161                            | 0.077 | <b>0.038</b>      |
| Visit/testing frequency, per 1 time/year higher                   | -0.076                           | 0.050 | 0.134             |
|                                                                   | <b>Total R<sup>2</sup>: 0.65</b> |       |                   |

\*A positive co-efficient indicates increased RNFLT variability, while a negative co-efficient indicates decreased RNFLT variability.

Abbreviation: AL = axial length, ART = automated real time value, CCT = central corneal thickness, CE = cataract extraction, IOP = intraocular pressure, OCT = optical coherence tomography, RNFL = retinal nerve fiber layer, RNFLT= RNFL thickness, SE = standard error, VF MD = visual field mean deviation
